# Supplementary material
Source: publisher figshare collection journal article supplement (https://sage.figshare.com/ndownloader/files/23727514)
Supplement: Supplementary file 1 [file 23727514]

## Appendix

### Supplemental Material

#### **Construct Validity of the German Wechsler Intelligence Scale for Children–Fifth Edition: Exploratory and Confirmatory Factor Analyses of the 15 Primary and Secondary Subtests**

Table A1

*Sources of Variance in the 15 German Wechsler Intelligence Scale for Children-Fifth Edition  
(WISC–V) Primary and Secondary Subtests for the Standardization Sample (N = 1,087)  
According to a Bifactor Model with Four Group Factors*

Table A1

*Sources of Variance in the 15 German Wechsler Intelligence Scale for Children-Fifth Edition (WISC-V) Primary and Secondary Subtests for the Standardization Sample (N = 1,087) According to a Bifactor Model with Four Group Factors*

| German WISC-V Subtest     | General |       | Verbal Comprehension |       | Visual Spatial |       | Working Memory |       | Processing Speed |       | $h^2$ | $u^2$ | ECV  |
|---------------------------|---------|-------|----------------------|-------|----------------|-------|----------------|-------|------------------|-------|-------|-------|------|
|                           | $b$     | $S^2$ | $b$                  | $S^2$ | $b$            | $S^2$ | $b$            | $S^2$ | $b$              | $S^2$ |       |       |      |
| Similarities              | .697    | .486  | .288                 | .083  |                |       |                |       |                  |       | .569  | .431  | .854 |
| Vocabulary                | .658    | .433  | .592                 | .350  |                |       |                |       |                  |       | .783  | .217  | .553 |
| Information               | .684    | .468  | .333                 | .111  |                |       |                |       |                  |       | .579  | .421  | .808 |
| Comprehension             | .548    | .300  | .462                 | .213  |                |       |                |       |                  |       | .514  | .486  | .585 |
| Block Design              | .634    | .402  |                      |       | .379           | .144  |                |       |                  |       | .546  | .454  | .737 |
| Visual Puzzles            | .659    | .434  |                      |       | .401           | .161  |                |       |                  |       | .595  | .405  | .730 |
| Matrix Reasoning          | .660    | .436  |                      |       | .136           | .018  |                |       |                  |       | .454  | .546  | .959 |
| Figure Weights            | .704    | .496  |                      |       | -.005          | .000  |                |       |                  |       | .496  | .504  | .999 |
| Arithmetic                | .726    | .527  |                      |       |                |       | .169           | .029  |                  |       | .556  | .444  | .949 |
| Digit Span                | .666    | .444  |                      |       |                |       | .409           | .167  |                  |       | .611  | .389  | .726 |
| Picture Span              | .572    | .327  |                      |       |                |       | .200           | .040  |                  |       | .367  | .633  | .891 |
| Letter-Number Sequencing  | .668    | .446  |                      |       |                |       | .405           | .164  |                  |       | .610  | .390  | .731 |
| Coding                    | .331    | .110  |                      |       |                |       |                |       | .643             | .413  | .523  | .477  | .209 |
| Symbol Search             | .363    | .132  |                      |       |                |       |                |       | .715             | .511  | .643  | .357  | .205 |
| Cancellation              | .232    | .054  |                      |       |                |       |                |       | .456             | .208  | .262  | .738  | .206 |
| Total Variance            |         | .366  |                      | .051  |                | .022  |                | .027  |                  | .076  | .540  | .460  |      |
| Explained Common Variance |         | .678  |                      | .093  |                | .040  |                | .049  |                  | .140  |       |       |      |
| $\omega$                  |         | .926  |                      | .859  |                | .805  |                | .818  |                  | .725  |       |       |      |
| $\omega_H/\omega_{HS}$    |         | .836  |                      | .254  |                | .085  |                | .137  |                  | .575  |       |       |      |
| Relative $\omega$         |         | .903  |                      | .295  |                | .105  |                | .168  |                  | .793  |       |       |      |
| Factor Correlation        |         | .914  |                      | .504  |                | .291  |                | .371  |                  | .758  |       |       |      |
| $H$                       |         | .907  |                      | .506  |                | .274  |                | .319  |                  | .668  |       |       |      |
| PUC                       |         | .800  |                      |       |                |       |                |       |                  |       |       |       |      |

*Note.*  $b$  = loading of subtest on factor,  $S^2$  = variance explained,  $h^2$  = communality,  $u^2$  = uniqueness, ECV = explained common variance,  $\omega_H$  = Omega-hierarchical (general factor),  $\omega_{HS}$  = Omega-hierarchical subscale (group factors),  $H$  = construct reliability or replicability index, PUC = percentage of uncontaminated correlations. Illustrated in Figure 3.
